**Biallelic loss of function variants in *WBP4*, encoding a spliceosome protein, result in a variable neurodevelopmental delay syndrome**

Eden Engal<sup>1,2\*</sup>, Kaisa Teele Oja<sup>3,4\*</sup>, Reza Maroofian<sup>5</sup>, Ophir Geminder<sup>1,2</sup>, Thuy-Linh Le<sup>6</sup>, Evyatar Mor<sup>7</sup>, Naama Tzvi<sup>8</sup>, Naama Elefant<sup>8</sup>, Maha S. Zaki<sup>9</sup>, Joseph G. Gleeson<sup>10,11</sup>, Kai Muru<sup>3,4</sup>, Sander Pajusalu<sup>3,4</sup>, Monica H. Wojcik<sup>12</sup>, Divya Pachat<sup>13</sup>, Marwa Abd Elmaksoud<sup>14</sup>, Won Chan Jeong<sup>15</sup>, Hane Lee<sup>15</sup>, Peter Bauer<sup>16</sup>, Giovanni Zifarelli<sup>16</sup>, Henry Houlden<sup>5</sup>, Orly Elpeleg<sup>8,17</sup>, Chris Gordon<sup>6</sup>, Tamar Harel<sup>8,17</sup>, Katrin Öunap<sup>3,4#</sup>, Maayan Salton<sup>1#</sup>, Hagar Mor-Shaked<sup>8,17#</sup>

<sup>1</sup> Department of Biochemistry and Molecular Biology, The Institute for Medical Research Israel-Canada, Faculty of Medicine, The Hebrew University of Jerusalem, Jerusalem 9112102, Israel

<sup>2</sup> Department of Military Medicine and "Tzameret", Faculty of Medicine, Hebrew University of Jerusalem, Jerusalem, Israel

<sup>3</sup> Genetics and Personalized Medicine Clinic, Tartu University Hospital, Tartu, Estonia

<sup>4</sup> Institute of Clinical Medicine, University of Tartu, Tartu, Estonia

<sup>5</sup> Department of Neuromuscular Disease, UCL Queen Square Institute of Neurology, London, UK

<sup>6</sup> Institute Imagine, Paris, France

<sup>7</sup> Department of computer science, Ben-Gurion University of the Negev

<sup>8</sup> Department of Genetics, Hadassah Medical Organization, Jerusalem, Israel

<sup>9</sup> Department of Clinical Genetics, Human Genetics and Genome Research Institute, Cairo, Egypt

<sup>10</sup> Department of Neurosciences, University of California, San Diego, La Jolla, USA

<sup>11</sup> Rady Children's Institute for Genomic Medicine, San Diego, La Jolla, USA

<sup>12</sup> Broad Institute of MIT and Harvard, Cambridge, MA

<sup>13</sup> Aster MIMS, Kozhikode, Kerala, India

NOTE: This preprint reports new research that has not been certified by peer review and should not be used to guide clinical practice.

|                                                                                                               |    |
|---------------------------------------------------------------------------------------------------------------|----|
| <sup>14</sup> Neurology Unit, Alexandria University Children's Hospital, Department of Pediatrics, Faculty of | 27 |
| Medicine, Alexandria University, Alexandria, Egypt                                                            | 28 |
| <sup>15</sup> 3billion, Seoul, Korea                                                                          | 29 |
| <sup>16</sup> CENTOGENE N.V., Am Strande 7, 18055 Rostock, Germany.                                           | 30 |
| <sup>17</sup> Faculty of Medicine, Hebrew University of Jerusalem, Jerusalem, Israel                          | 31 |
|                                                                                                               | 32 |
| *, # These authors contributed equally.                                                                       | 33 |
|                                                                                                               | 34 |
|                                                                                                               | 35 |
|                                                                                                               | 36 |
| <b>Corresponding authors:</b>                                                                                 | 37 |
| Hagar Mor-Shaked Ph.D.                                                                                        | 38 |
| Department of Genetics                                                                                        | 39 |
| Hadassah-Hebrew University Medical Center                                                                     | 40 |
| POB 12000                                                                                                     | 41 |
| Jerusalem, Israel                                                                                             | 42 |
| +(972)-2-6776931 (office)                                                                                     | 43 |
| +(972)-2-6777618 (fax)                                                                                        | 44 |
| Email: <a href="mailto:hagarmor@hadassah.org.il">hagarmor@hadassah.org.il</a>                                 | 45 |
|                                                                                                               | 46 |
|                                                                                                               | 47 |
| Keywords: pre-mRNA splicing, spliceosome, syndromic neurodevelopmental disorder, <i>WBP4</i>                  | 48 |
|                                                                                                               | 49 |
|                                                                                                               | 50 |

|                                                                                                          |    |
|----------------------------------------------------------------------------------------------------------|----|
| ABSTRACT                                                                                                 | 51 |
| Over two dozen spliceosome proteins are involved in human diseases, also referred to as                  | 52 |
| spliceosomopathies. WBP4 (WW Domain Binding Protein 4) is part of the early spliceosomal complex,        | 53 |
| and was not described before in the context of human pathologies. Ascertained through GeneMatcher        | 54 |
| we identified eleven patients from eight families, with a severe neurodevelopmental syndrome with        | 55 |
| variable manifestations. Clinical manifestations included hypotonia, global developmental delay,         | 56 |
| severe intellectual disability, brain abnormalities, musculoskeletal and gastrointestinal abnormalities. | 57 |
| Genetic analysis revealed overall five different homozygous loss-of-function variants in <i>WBP4</i> .   | 58 |
| Immunoblotting on fibroblasts from two affected individuals with different genetic variants              | 59 |
| demonstrated complete loss of protein, and RNA sequencing analysis uncovered shared abnormal             | 60 |
| splicing patterns, including enrichment for abnormalities of the nervous system and musculoskeletal      | 61 |
| system genes, suggesting that the overlapping differentially spliced genes are related to the common     | 62 |
| phenotypes of the probands. We conclude that biallelic variants in <i>WBP4</i> cause a spliceosomopathy. | 63 |
| Further functional studies are called for better understanding of the mechanism of pathogenicity.        | 64 |
|                                                                                                          | 65 |
|                                                                                                          | 66 |

INTRODUCTION 67

The spliceosome is a complex of RNA and proteins responsible for promoting accurate splicing. More than two dozen spliceosome proteins are known to be involved in human diseases, also referred as spliceosomopathies. Despite the fundamental function of the spliceosome in all tissues, spliceosomopathies are typically tissue specific, resulting in defects affecting only one cell type.<sup>1</sup> For example, the widely expressed SNRNP200 is part of the U4/U6 complex, and is a known cause of Retinitis pigmentosa 33, which affects exclusively the retina.<sup>2</sup> This observation suggests that the particular components of the spliceosome play a crucial role in accurately splicing specific targets, which can lead to the development of distinct pathologies.

WBP4 (WW Domain Binding Protein 4), previously known as FBP21, is a 376-amino acid spliceosome protein that contains a zinc finger motif and two tandem-WW domains. It was first detected as part of the early spliceosomal complex, where it interacts with the U2-associated protein SF3B4, SIPP1, and the core splicing protein Smb/B'. These interactions are facilitated by the transient multivalent recognition of the WW domains with proline-rich sequences.<sup>3-6</sup> Later it was found to be present exclusively in the Spliceosome B complex (B complex-specific proteins) which acts directly before spliceosomal catalytic activation. WBP4 was found to bind and inhibit SNRNP200 similarly to C9ORF78 and TSSC4.<sup>7,8</sup> In the transition from the B to the Bact complex, the RNA helicase SNRNP200 unwinds the U4/U6 duplex, releasing the U4 snRNP, and enabling the U6 snRNA to base-pair with the U2 snRNA, forming a catalytically important stem-loop.<sup>9,10</sup> Thus, inhibition of SNRNP200 plays a crucial role in splice site selection, which positions WBP4 as a key player with a vital role in determining the outcome of splicing.

Overall, WBP4 was shown to enhance splicing in vitro and in vivo,<sup>5</sup> and to regulate alternative splicing,<sup>11</sup> but was not described before in the context of human pathologies. Here we report a severe neurodevelopmental syndrome with variable manifestations caused by homozygous loss of function (LOF) variants in the *WBP4* gene in eight unrelated families.

|                                                                                                                      |     |
|----------------------------------------------------------------------------------------------------------------------|-----|
| MATERIAL AND METHODS                                                                                                 | 92  |
| <b>Ethics statement.</b> The study was conducted in accordance with IRB-approved protocol 0306-10-HMO,               | 93  |
| and in accordance with the Declaration of Helsinki and approved by the Research Ethics Committee of                  | 94  |
| the University of Tartu (Certificate No 269/M-18 on 17.04.2017). Informed consent for participation                  | 95  |
| and for publication of facial photographs was obtained from the patient's parents.                                   | 96  |
|                                                                                                                      | 97  |
| <b>Exome sequencing.</b> Duo exome sequencing was performed for Family 1. Exonic sequences from DNA                  | 98  |
| were enriched with the SureSelect Human All Exon 50 Mb V5 Kit (Agilent Technologies, Santa Clara,                    | 99  |
| California, USA) (proband F1-II:1), or xGen Exome Research Panel v2 kit (Integrated DNA Technologies,                | 100 |
| IDT) (proband F1-II:4). Sequences were generated on a NovaSeq6000 sequencing system (Illumina, San                   | 101 |
| Diego, California, USA) as 150-bp paired-end runs. The FASTQs were uploaded into the GeneX Analysis                  | 102 |
| platform. <sup>12</sup> Alignment and variant calling of single nucleotide variations (SNVs), structural variants    | 103 |
| (SVs), CNVs and repeats were called using Illumina DRAGEN Bio-IT, with hg19 as human reference                       | 104 |
| genome. The resulting VCF files were comprehensively annotated on the GeneX Analysis annotation                      | 105 |
| engine, and presented for analysis, filtering and interpretation. Exome analysis of the probands yielded             | 106 |
| 40 and 120 million reads, with a mean coverage of 80 and 120X, in accordance.                                        | 107 |
| For Family 2, trio exome sequencing was performed in clinical diagnostic settings at Tartu University                | 108 |
| Hospital. SureSelect Human All Exon V5 kit (Agilent Technologies, Santa Clara, California, USA) was                  | 109 |
| used for exome enrichment of the genomic DNA extracted from blood. The enriched exome was                            | 110 |
| sequenced on HiSeq 4000 (Illumina, San Diego, California, USA) platform. The data processing and                     | 111 |
| variant calling pipeline followed Genome Analysis Toolkit's best practice guidelines. <sup>13</sup> The specifics of | 112 |
| the in-house pipeline have been previously described. <sup>14</sup> Exome sequencing of families 3-6 were            | 113 |
| sequenced and analyzed as published elsewhere. <sup>15-17</sup>                                                      | 114 |
|                                                                                                                      | 115 |
| <b>Sanger sequencing.</b> An amplicon containing the variant of interest was amplified by conventional PCR           | 116 |
| of genomic DNA, and analyzed by Sanger dideoxy nucleotide sequencing.                                                | 117 |

**Whole genome sequencing (Family 2).** Whole genome sequencing and data processing were performed by the Genomics Platform at the Broad Institute of MIT and Harvard. PCR-free preparation of sample DNA (350 ng input at >2 ng/ul) is accomplished using Illumina HiSeq X Ten v2 chemistry. Libraries are sequenced to a mean target coverage of >30x. Genome sequencing data was processed through a pipeline based on Picard, using base quality score recalibration and local realignment at known indels. The BWA aligner was used for mapping reads to the human genome build 38. Single Nucleotide Variants (SNVs) and insertions/deletions (indels) are jointly called across all samples using Genome Analysis Toolkit (GATK) HaplotypeCaller package version 3.4. Default filters were applied to SNV and indel calls using the GATK Variant Quality Score Recalibration (VQSR) approach. Annotation was performed using Variant Effect Predictor (VEP). Lastly, the variant call set was uploaded to seqr for collaborative analysis between the CMG and investigator. Loss of heterozygosity regions was calculated by Manta, Smoove and Delly programs.

**Diagnostic RNA sequencing.** For Family 2, patient-derived fibroblasts were cultivated in AmnioMAX-c100. Human whole transcriptome sequencing was performed by the Genomics Platform at the Broad Institute of MIT and Harvard. The transcriptome product combines poly(A)-selection of mRNA transcripts with a strand-specific cDNA library preparation, with a mean insert size of 550bp. Libraries were sequenced on the HiSeq 2500 platform to a minimum depth of 50 million STAR-aligned reads. ERCC RNA controls are included for all samples, allowing additional control of variability between samples. STAR (version 2.5.3) aligner was used to map sequencing reads to GRCh38 reference genome; genes and transcripts were defined using GENCODE v26. To detect expression outliers STAR generated reads per gene counts of 40 unsolved pediatric patients with suspicion of a genetic disorder and 100 controls from GTEx were analyzed using R package OUTRIDER.<sup>18</sup> Statistical significance was determined using a cut-off of 0.05 for the adjusted p-values. The results were analyzed collaboratively between Broad CMG and investigators from Tartu University Hospital.

**Cell lines.** CCD-1092Sk cells (ATCC Number: CRL-2114) and primary fibroblasts cells from biopsy were 143  
grown in Dulbecco's modified Eagle's medium (DMEM) supplemented with 10% fetal bovine serum 144  
(FBS). Cells were maintained at 37°C and 5% CO<sub>2</sub> atmosphere. 145  
146

**Immunoblotting.** For immunoblotting, cells were harvested and lysed with NP-40 1% lysis buffer, and 147  
20 µg of the extracts were run on a 10% TGX Stain-free FastCast gel (BioRad) and transferred onto a 148  
nitrocellulose membrane. Antibodies used for immunoblotting were anti-WBP4 (Bethyl Laboratories # 149  
A305-693A-M), and anti-Actin. 150  
151

**RNA Sequencing and analysis.** RNA from primary fibroblasts was isolated using the GENEzol™ TriRNA 152  
Pure Kit (Geneaid). RNA samples for three biological replicates (approximately 1×10<sup>6</sup> cells for family 1 153  
and approximately 0.3×10<sup>6</sup> cells for family 2) were subjected to sequencing. Raw reads were assessed 154  
using the FastQC tool v0.11.9. The processed reads were aligned to the human transcriptome and 155  
genome version GRCh38 with annotations from using STAR v2.7.10.<sup>19</sup> Counts per gene quantification 156  
was done with featureCounts v2.0.1.<sup>20</sup> Normalization and differential expression analysis were done 157  
with the DESeq2 package v 1.30.1.<sup>21</sup> Pair-wise comparisons were tested with default parameters (Wald 158  
test), without applying the independent filtering algorithm. Significance threshold was taken as 159  
padj<0.05. In addition, significant DE genes were further filtered by the log<sub>2</sub>FoldChange value with 160  
lfcThreshold=1. rMATS v4.1.2<sup>22</sup> was used to identify differential alternative splicing events. For each 161  
alternative splicing event, we used the calculation on both the reads mapped to the splice junctions 162  
and the reads mapped to the exon body (JCEC). Significance threshold was taken as FDR<0.05. In 163  
addition, significant splicing events were further filtered by the Inclusion level difference value for 164  
InclDiff > |0.1|. Gene-set enrichment analysis was performed using the GeneAnalytics tool.<sup>23</sup> 165  
166

**Gene-phenotype relationship analysis.** Gene-phenotype associations were calculated using Geneyx 167  
Analysis phenotyper tool. 168

|                                                                                                                                                                                                                                                                                                                                                                                                                                                                                                                                                                                                                                                                                                                                                                                                                                                                                                                                                                                                                                                                                                                                                                                                                                                                    |                                                                                         |
|--------------------------------------------------------------------------------------------------------------------------------------------------------------------------------------------------------------------------------------------------------------------------------------------------------------------------------------------------------------------------------------------------------------------------------------------------------------------------------------------------------------------------------------------------------------------------------------------------------------------------------------------------------------------------------------------------------------------------------------------------------------------------------------------------------------------------------------------------------------------------------------------------------------------------------------------------------------------------------------------------------------------------------------------------------------------------------------------------------------------------------------------------------------------------------------------------------------------------------------------------------------------|-----------------------------------------------------------------------------------------|
| RESULTS                                                                                                                                                                                                                                                                                                                                                                                                                                                                                                                                                                                                                                                                                                                                                                                                                                                                                                                                                                                                                                                                                                                                                                                                                                                            | 169                                                                                     |
| <b>Biallelic mutations in <i>WBP4</i> cause highly variable neurodevelopmental syndrome</b>                                                                                                                                                                                                                                                                                                                                                                                                                                                                                                                                                                                                                                                                                                                                                                                                                                                                                                                                                                                                                                                                                                                                                                        | 170                                                                                     |
| To identify the genetic cause of a developmental delay and autism in a male child born to a consanguineous family (Figure 1A, F1-II:1), and of another affected offspring (individual F1-II:4; fetus with atrioventricular (AV)-canal, suspected absence of thymus, and intrauterine growth restriction), quad exome sequencing was performed. No pathogenic variants in genes known to be associated with neurological disorders were found, or any other known pathogenic events in both siblings. As the consanguineous background was suggestive for autosomal recessive inheritance, we focused on rare homozygous variants. A potentially harmful homozygous frameshift variant in <i>WBP4</i> was found in both siblings (chr13:g. 41072793 GA > G; NM_007187.5:c.499delA; p.(Thr167fs)(hg38)), predicted to result in a premature stop codon. Segregation study by Sanger sequencing revealed that the parents were heterozygous carriers, affected individuals were homozygous for the variant, and two unaffected siblings were either heterozygous or homozygous wild type (WT) (Figure 1A and Figure S1). This variant is absent from the Genome Aggregation Database (gnomAD), and no other homozygous LOF variant in this gene was described before. | 171<br>172<br>173<br>174<br>175<br>176<br>177<br>178<br>179<br>180<br>181<br>182<br>183 |
| Through GeneMatcher <sup>24</sup> , a total of 11 affected individuals from eight families were identified, all carrying homozygous LOF variants (Table 1 and Figure 1A, 1C). All variants were absent or had an extremely low frequency (<0.01%) in public databases.                                                                                                                                                                                                                                                                                                                                                                                                                                                                                                                                                                                                                                                                                                                                                                                                                                                                                                                                                                                             | 184<br>185<br>186                                                                       |
| Interestingly, some of the patients had a much more severe phenotype. The patient from Family 2 was a male patient born as a first child from a complicated pregnancy to non-consanguineous parents. Bilateral hydronephrosis, intrauterine growth retardation (IUGR) and mild oligohydramnios were seen during pregnancy in ultrasound. The child was born prematurely at 35+5 weeks of gestation via emergency C-section. At birth, all his growth parameters were below the 3rd percentile (weight 1616 g, length 40 cm, head circumference 29 cm). He had multiple congenital anomalies – anal atresia with fistula into bladder, distal hypospadias and cryptorchidism, bilateral hydronephrosis, congenital heart defect - atrial septal defect (VCC-ASD), agenesis of corpus callosum (CCA) and dysmorphic features                                                                                                                                                                                                                                                                                                                                                                                                                                         | 187<br>188<br>189<br>190<br>191<br>192<br>193<br>194                                    |



(dolichocephaly, proptosis, hypertelorism, depressed nasal bridge, microretrognathia). Clinically, the VACTERL association was diagnosed. He presented failure to thrive, bilateral neurosensory hearing loss, optic nerve atrophy, convergent strabismus, global developmental delay, hypotonia, dysphagia and frequent infections. Electroencephalogram showed altered electrical activity without epileptiform abnormalities, and brain Magnetic resonance imaging (MRI) confirmed the CCA and frontotemporal widening of subarachnoidal space (Figure 1B). Trio exome analysis was performed, but no pathogenic variants could be associated with the patient's phenotype. In early childhood, trio genome sequencing, RNA sequencing from fibroblast cell cultures and untargeted metabolomics analysis from serum were additionally performed. RNA sequencing revealed a very low expression of the *WBP4* gene (Figure S3), and reanalysis of genome data indicated a homozygous deletion in this region (Figure S4). Homozygous deletion of the three last exons of the *WBP4* gene was validated by Sanger sequencing. The deletion is located in a ~6.2 Mb size loss of heterozygosity (LOH)-region (precise coordinates for deletion chr13:41,074,140-41,090,168 (hg38)).

The most common clinical features among the affected individuals in eight families were global developmental delay, muscular hypotonia, dysmorphic facial features and feeding difficulties or failure to thrive (Table 1). Morphological central nervous system abnormalities, atypical behavior and moderate to severe intellectual disability were present in almost half of the patients. In some cases congenital abnormalities of the heart, gastrointestinal, skeletal and/or urogenital system were evident. The individual clinical features are described in detail in supplementary materials (Table S1).

### **RNA sequencing analysis**

Considering the fact that *WBP4* codes for a spliceosome protein, we wished to understand how splicing is altered in cells lacking *WBP4*. For this, we took a skin biopsy from affected individuals F1-II:1 and F2-II:1 and their parents. Primary fibroblasts were grown and protein was extracted to evaluate the amount of *WBP4* in the probands relative to their heterozygote parents and WT fibroblasts. Our results

show that in both cases the heterozygote parents show half of WBP4 protein amount relative to the WT control and that probands with homozygous *WBP4* mutations have total ablation of WBP4 protein (Figure 2A).

In addition, we extracted RNA from fibroblasts of the parents as well as probands and conducted RNA sequencing (RNA-seq). WBP4 mRNA amount was reduced in proband F1-II:1, as is expected by an early termination codon leading to nonsense mediated decay. In proband F2-II:1 expression was low and the transcript terminates at exon 7 out of 10 (NM\_007187.5) as expected by the deletion location relative to the *WBP4* gene (Figure S5). Following analysis of the RNA-seq results we detected 579 genes with changes in gene expression in proband F1-II:1 relative to his parents (FDR<0.05, DEseq<sup>21</sup>). To understand if these genes contribute to the proband's phenotype, we used the GeneAnalytics tool<sup>23</sup> to identify diseases related to the gene set. The human phenotype ontology pointed at enrichment for skin related phenotypes. Analyzing the results of the F2-II:1 proband we found 1,068 genes with altered gene expression as compared to his parents (FDR<0.05, DEseq<sup>21</sup>) with a human phenotype enrichment of skin conditions as well as abnormalities in cardiovascular physiology (Figure S6A). We hypothesize that skin diseases enrichment which is not part of the probands' phenotypes could suggest a difference in gene expression of skin-related genes between the young probands and their adult parents' fibroblasts. Comparing the change in gene expression between the two probands we found 89 overlapping genes (P value<0.00001, Fisher exact test, Figure 2C) with no disease relevant gene set enrichment (Figure S6B and Table S2).

We have used rMATS (version 4.1.2) to identify abnormal splicing in the probands.<sup>22</sup> Our analysis identified 5,675 differential splicing events in 2,859 genes in proband F1-II:1 compared to his parents (Figure 2B, upper panel, Table S3). All types of splicing events were present: skipped exons (2,445 events), alternative 5' splice site (654 events), alternative 3' splice site (629 events), mutually exclusive exons (1,268 events) and intron retention (679 events). To check if the differentially spliced genes are related to the proband's phenotype, we used the GeneAnalytics tool<sup>23</sup> and found enrichment for abnormalities of the musculoskeletal and the nervous system (Figure 2C, upper panel). Comparing

proband F2-II:1 to his parents we identified 2,868 differential splicing events in 1,555 genes (Figure 2B, 247  
lower panel, Table S3). Again, all types of splicing events were identified: skipped exons (1,361 events), 248  
alternative 5' splice site (270 events), alternative 3' splice site (173 events), mutually exclusive exons 249  
(478 events) and intron retention (586 events). The human phenotype ontology pointed at genes 250  
related to the nervous system and the musculoskeletal system similar to proband F1-II:1 (Figure 2C, 251  
lower panel). While, WBP4 is expressed in all tissues it was found to be higher in the skeletal and heart 252  
muscles<sup>25</sup> (Figure S8). This higher expression corresponds to the abnormal splicing of the 253  
musculoskeletal genes and to the heart anomaly - atrial septal defect in proband F2-II:1 (Table 1). 254  
The principal components of the quantile normalized and standardized reads per exon show similarity 255  
between the two probands and the distinction of each proband from his parents (Figure 3A). 256  
Moreover, the probands samples are very distinct from samples of healthy, WBP4 +/+ children (Figure 257  
3A). We continued to check the similarity in splicing events between the two probands and found 619 258  
genes changing in splicing in both probands (Figure 3B, Figure S9A-C, and Table S3, P value<0.00001, 259  
Fisher exact test). To check if the common differentially spliced genes in both probands are related to 260  
their phenotype, we used the GeneAnalytics tool to perform human phenotype enrichment analysis. 261  
We found enrichment for abnormalities of the nervous system and musculoskeletal system, suggesting 262  
that the overlapping differentially spliced genes are related to the common phenotypes of the 263  
proband (Figure 3C). Among the differentially spliced genes related to the probands' phenotype we 264  
identified for example *HUWE1*, *SMARCA2*, *SMARCC2*, *HNRNPH1* and *TCF4*. To understand if a 265  
connection exists between regulation of expression to that of splicing by WBP4 we compared the 266  
genes changing in expression to that of splicing. We could find a small but significant overlap that can 267  
be a result of an abnormal splicing event leading to a change in gene expression, as an inclusion of an 268  
exon or a retained intron harboring a stop codon (Figure S9D-F). 269  
Overall, the significant and shared alterations in splicing patterns in both patients, despite the distinct 270  
ethnic change, point at a similar cause. As suggested by the role of WBP4 in the inhibition of 271  
*SNRNP200* and its exclusive presence in the B complex, where it acts directly before spliceosomal 272

catalytic activation, depletion of *WBP4* in both patients leads to a similar pattern of abnormal splicing 273  
and a shared pathomechanism of *WBP4* loss of function. 274

In order to determine the clinical relevance of differentially expressed (DE) and aberrantly spliced (AS) 275  
genes that the two probands (F1-II:1 and F2-II:1) had in common (89 and 619 genes respectively), we 276  
performed gene-phenotype relationship analysis. We analyzed the association between DE and AS 277  
genes symbols to 19 phenotypes found in at least 3 patients (Table 1). The search resulted in 46 (51.6%) 278  
and 356 (57.5%) directly related DE and AS genes (in accordance). 19.5% and 30% of the DE and AS 279  
related genes had at least 10 out of 19 phenotypic matches (in accordance). In a combined analysis of 280  
both DE and AS genes the top 10 highest ranking hits were all alternatively spliced – *NFIX*, *TRIO*, 281  
*ANKRD11*, *SZT2*, *HUWE1*, *PIGT*, *SMARCC2*, *PEX1*, *QRICH1*, *HRAS* (Table S4). This indicates that the 282  
alternatively spliced genes are more strongly connected to the patients' phenotype. 283

DISCUSSION 284

97% of human genes undergo pre-mRNA splicing, a process catalyzed by the spliceosome, a multi 285  
subunit complex. The spliceosome is comprised of small noncoding RNA molecules (U1, U2, U4, U5 286  
and U6) as well as proteins.<sup>26–29</sup> Among the spliceosome proteins, WBP4 is part of a group that plays a 287  
critical role in splice site decisions. These B-complex-specific proteins act directly before spliceosomal 288  
catalytic activation, fixing the specific splicing pattern of a substrate through irreversible loss of U4. In 289  
the transition from the B to the Bact complex, the RNA helicase SNRNP200 unwinds the U4/U6 duplex, 290  
releasing the U4 snRNP and enabling the U6 snRNA to base-pair with the U2 snRNA and form a 291  
catalytically important stem–loop. Therefore, WBP4 is a key player in spliceosomal activation. 292

Precise and fine-tuned gene expression is crucial for proper brain development. Neurodevelopment 293  
regulatory pathways are coordinated in space and time to produce a well-connected neuronal 294  
network.<sup>30</sup> Over two dozen spliceosome proteins have been linked to human diseases, which are 295  
collectively referred to as spliceosomopathies. The tissue-specific nature of most spliceosome 296  
components suggests that they are not functionally equivalent. Studying spliceosomopathies can 297  
increase our understanding of the spliceosome and its functions. 298

Here we report a highly variable neurodevelopment syndrome caused by homozygous loss of function 299  
variants in *WBP4*, in eight different families. 300

The clinical presentation of the different affected individuals was highly variable. Individuals F1-II:1 and 301  
F2-II:1 presented the two sides of the spectrum, with one displaying a severe phenotype leading to 302  
multiple malformations and premature death (F2-II:1) and one only showing much less severe 303  
phenotype, with mainly intellectual disability and motor delay. Nevertheless, the two individuals have 304  
shared alterations in splicing patterns, stemming from *WBP4* loss of function. While these phenotypic 305  
differences might be due to the nature of the genetic variants (large deletion in F2-II:1 vs. a frameshift 306  
variant in F1-II:1), they could also be a characteristic of spliceosomopathies, as previously shown in 307  
*CWC27* mutations, which lead to a spectrum of conditions including retinal degeneration, short 308

stature, craniofacial abnormalities, brachydactyly, and neurological defects.<sup>31</sup> This is also supported by 309  
the fact that both patients were shown to have complete loss of *WBP4* protein. 310  
Seven out of the top ten alternatively spliced genes with highest phenotype match, are known 311  
autosomal dominant genes. This fits with the assumption that splicing alteration are incomplete, 312  
mimicking a dominant effect. 313  
One individual F2-II:1 presented the VACTERL association that comprises patients with at least three 314  
of the following characteristic features – vertebral defects, anal atresia, cardiac defects, tracheo- 315  
esophageal fistula, renal anomalies, and limb abnormalities. It has previously shown that heterozygous 316  
loss of *WBP11* function cause a variety of overlapping congenital malformations, including cardiac, 317  
vertebral, tracheo-esophageal, renal and limb defects.<sup>32</sup> *WBP11*, similarly to *WBP4*, encodes a 318  
component of the spliceosome with the ability to activate pre-messenger RNA splicing. *WBP11* 319  
heterozygous null mice are small and exhibit defects in axial skeleton, kidneys and esophagus. Our 320  
results support the conclusion of Martin et al 2020<sup>32</sup> that loss-of function *WBP11* and *WBP4* variants 321  
should be considered as a possible cause of VACTERL association. 322  
Larger cohort of affected individuals is necessary to recapitulate the entire spectrum of the *WBP4*- 323  
related disorder, and further functional studies are called for better understanding of the mechanism 324  
of pathogenicity. 325

## ACKNOWLEDGEMENTS 328

The authors wish to thank the families for their participation in this study. 329  
This work is supported by Estonian Research Council grants PRG471 and PSG774. The Broad Institute 330  
Center for Mendelian Genomics (UM1HG008900) is funded by the National Human Genome Research 331  
Institute with supplemental funding provided by the National Heart, Lung, and Blood Institute under 332  
the Trans-Omics for Precision Medicine (TOPMed) program and the National Eye Institute. MHW is 333  
supported by K23HD102589. 334

|                                                                                                            |     |
|------------------------------------------------------------------------------------------------------------|-----|
|                                                                                                            | 335 |
| AUTHOR CONTRIBUTIONS                                                                                       | 336 |
| H.M.-S., K.T.O., M.S., and E.E. designed the study and wrote the paper. T.H. and K.O. supervised the       | 337 |
| study, and contributed to writing the paper. H.M.-S. (F1) recognized this disease as a new clinical entity | 338 |
| with the F1. E.E. has performed the comparative RNA sequencing analyses, and O.G. grew fibroblasts,        | 339 |
| extracted RNA and performed the western blot analyses, both under the supervision of M.S. N.E., M.T.,      | 340 |
| and O.E. (F1) provided genetic consultation and evaluation. K.M. and K.O. (F2) provided genetic            | 341 |
| consultation and evaluation. S.P., M.H-W., K.O. and K.T.O. (F2) performed sequencing and analysis of       | 342 |
| trio genome and RNA for F2. R.M (F3-6) coordinated the local clinical study. M.Z. (F4, F5) J.G. (F5) ...   | 343 |
| D.P. (F6) provided genetic consultation and evaluation. C.G and T-L.L. (F7-8) performed sequencing and     | 344 |
| analyses and coordinated the local clinical study.                                                         | 345 |
|                                                                                                            | 346 |
| DECLARATION OF INTERESTS                                                                                   | 347 |
| HMS is an employee of Geneyx Genomics. Other authors declare no conflict of interest.                      | 348 |
|                                                                                                            | 349 |
| DATA AVAILABILITY                                                                                          | 350 |
| The ClinVar accession number for the DNA variants data are:                                                | 351 |
| SCV003922044 WBP4 NM_007187.5 c.499delA                                                                    | 352 |
| SCV003922045 WBP4 NC_000013.11 g.41074134_41090164del                                                      | 353 |
| SCV003922046 WBP4 NM_007187.5 c.668C>G                                                                     | 354 |
| SCV003922047 WBP4 NM_007187.5 c.944delC                                                                    | 355 |
| SCV003922048 WBP4 NM_007187.5 c.440-1G>A.                                                                  | 356 |
|                                                                                                            | 357 |
| All analyzed data consists of patient's personal data and is stored according to regulations of the        | 358 |
| institutions. Pseudonymized data is available on request.                                                  | 359 |
|                                                                                                            | 360 |

|                                                                                                                                                                                                                                                                                               |                          |
|-----------------------------------------------------------------------------------------------------------------------------------------------------------------------------------------------------------------------------------------------------------------------------------------------|--------------------------|
| REFERENCES                                                                                                                                                                                                                                                                                    | 361                      |
| 1. Griffin C, Saint-Jeannet JP. Spliceosomopathies: Diseases and mechanisms. <i>Dev Dyn Off Publ Am Assoc Anat.</i> 2020;249(9):1038-1046. doi:10.1002/dvdy.214                                                                                                                               | 362<br>363               |
| 2. Zhao C, Bellur DL, Lu S, et al. Autosomal-dominant retinitis pigmentosa caused by a mutation in SNRNP200, a gene required for unwinding of U4/U6 snRNAs. <i>Am J Hum Genet.</i> 2009;85(5):617-627. doi:10.1016/j.ajhg.2009.09.020                                                         | 364<br>365<br>366        |
| 3. Bedford MT, Reed R, Leder P. WW domain-mediated interactions reveal a spliceosome-associated protein that binds a third class of proline-rich motif: the proline glycine and methionine-rich motif. <i>Proc Natl Acad Sci U S A.</i> 1998;95(18):10602-10607. doi:10.1073/pnas.95.18.10602 | 367<br>368<br>369<br>370 |
| 4. Chan DC, Bedford MT, Leder P. Formin binding proteins bear WWP/WW domains that bind proline-rich peptides and functionally resemble SH3 domains. <i>EMBO J.</i> 1996;15(5):1045-1054.                                                                                                      | 371<br>372               |
| 5. Huang X, Beullens M, Zhang J, et al. Structure and Function of the Two Tandem WW Domains of the Pre-mRNA Splicing Factor FBP21 (Formin-binding Protein 21). <i>J Biol Chem.</i> 2009;284(37):25375-25387. doi:10.1074/jbc.M109.024828                                                      | 373<br>374<br>375        |
| 6. Klippel S, Wieczorek M, Schümann M, et al. Multivalent Binding of Formin-binding Protein 21 (FBP21)-Tandem-WW Domains Fosters Protein Recognition in the Pre-spliceosome. <i>J Biol Chem.</i> 2011;286(44):38478-38487. doi:10.1074/jbc.M111.265710                                        | 376<br>377<br>378        |
| 7. Henning LM, Santos KF, Sticht J, et al. A new role for FBP21 as regulator of Brr2 helicase activity. <i>Nucleic Acids Res.</i> 2017;45(13):7922-7937. doi:10.1093/nar/gkx535                                                                                                               | 379<br>380               |
| 8. Bergfort A, Hilal T, Kuroпка B, et al. The intrinsically disordered TSSC4 protein acts as a helicase inhibitor, placeholder and multi-interaction coordinator during snRNP assembly and recycling. <i>Nucleic Acids Res.</i> 2022;50(5):2938-2958. doi:10.1093/nar/gkac087                 | 381<br>382<br>383        |
| 9. Raghunathan PL, Guthrie C. RNA unwinding in U4/U6 snRNPs requires ATP hydrolysis and the DEIH-box splicing factor Brr2. <i>Curr Biol CB.</i> 1998;8(15):847-855. doi:10.1016/s0960-9822(07)00345-4                                                                                         | 384<br>385<br>386        |
| 10. Lagerbauer B, Achsel T, Lührmann R. The human U5-200kD DEXH-box protein unwinds U4/U6 RNA duplexes in vitro. <i>Proc Natl Acad Sci U S A.</i> 1998;95(8):4188-4192.                                                                                                                       | 387<br>388               |
| 11. Woolard J, Vousden W, Moss SJ, et al. Borrelidin modulates the alternative splicing of VEGF in favour of anti-angiogenic isoforms. <i>Chem Sci R Soc Chem</i> 2010. 2011;2011(2):273-278. doi:10.1039/C0SC00297F                                                                          | 389<br>390<br>391        |
| 12. Dahary D, Golan Y, Mazor Y, et al. Genome analysis and knowledge-driven variant interpretation with TGex. <i>BMC Med Genomics.</i> 2019;12(1):200. doi:10.1186/s12920-019-0647-8                                                                                                          | 392<br>393               |
| 13. Van der Auwera GA, Carneiro MO, Hartl C, et al. From FastQ data to high confidence variant calls: the Genome Analysis Toolkit best practices pipeline. <i>Curr Protoc Bioinforma.</i> 2013;43(1110):11.10.1-11.10.33. doi:10.1002/0471250953.bi1110s43                                    | 394<br>395<br>396        |
| 14. Pajusalu S, Reimand T, Õunap K. Novel homozygous mutation in KPTN gene causing a familial intellectual disability-macrocephaly syndrome. <i>Am J Med Genet A.</i> 2015;167A(8):1913-1915. doi:10.1002/ajmg.a.37105                                                                        | 397<br>398<br>399        |



|                                                                                                                                                                                                                                                                                                    |                          |
|----------------------------------------------------------------------------------------------------------------------------------------------------------------------------------------------------------------------------------------------------------------------------------------------------|--------------------------|
| 15. Seo GH, Lee H, Lee J, et al. Diagnostic performance of automated, streamlined, daily updated exome analysis in patients with neurodevelopmental delay. <i>Mol Med Camb Mass.</i> 2022;28(1):38. doi:10.1186/s10020-022-00464-x                                                                 | 400<br>401<br>402        |
| 16. Bertoli-Avella AM, Kandaswamy KK, Khan S, et al. Combining exome/genome sequencing with data repository analysis reveals novel gene-disease associations for a wide range of genetic disorders. <i>Genet Med Off J Am Coll Med Genet.</i> 2021;23(8):1551-1568. doi:10.1038/s41436-021-01159-0 | 403<br>404<br>405<br>406 |
| 17. Makrythanasis P, Maroofian R, Stray-Pedersen A, et al. Biallelic variants in KIF14 cause intellectual disability with microcephaly. <i>Eur J Hum Genet EJHG.</i> 2018;26(3):330-339. doi:10.1038/s41431-017-0088-9                                                                             | 407<br>408<br>409        |
| 18. Brechtmann F, Mertes C, Matusėvičiūtė A, et al. OUTRIDER: A Statistical Method for Detecting Aberrantly Expressed Genes in RNA Sequencing Data. <i>Am J Hum Genet.</i> 2018;103(6):907-917. doi:10.1016/j.ajhg.2018.10.025                                                                     | 410<br>411<br>412        |
| 19. Kim D, Pertea G, Trapnell C, Pimentel H, Kelley R, Salzberg SL. TopHat2: accurate alignment of transcriptomes in the presence of insertions, deletions and gene fusions. <i>Genome Biol.</i> 2013;14(4):R36. doi:10.1186/gb-2013-14-4-r36                                                      | 413<br>414<br>415        |
| 20. Anders S, Pyl PT, Huber W. HTSeq--a Python framework to work with high-throughput sequencing data. <i>Bioinforma Oxf Engl.</i> 2015;31(2):166-169. doi:10.1093/bioinformatics/btu638                                                                                                           | 416<br>417               |
| 21. Love MI, Huber W, Anders S. Moderated estimation of fold change and dispersion for RNA-seq data with DESeq2. <i>Genome Biol.</i> 2014;15(12):550. doi:10.1186/s13059-014-0550-8                                                                                                                | 418<br>419               |
| 22. Shen S, Park JW, Lu Z xiang, et al. rMATS: robust and flexible detection of differential alternative splicing from replicate RNA-Seq data. <i>Proc Natl Acad Sci U S A.</i> 2014;111(51):E5593-5601. doi:10.1073/pnas.1419161111                                                               | 420<br>421<br>422        |
| 23. Ben-Ari Fuchs S, Lieder I, Stelzer G, et al. GeneAnalytics: An Integrative Gene Set Analysis Tool for Next Generation Sequencing, RNAseq and Microarray Data. <i>Omics J Integr Biol.</i> 2016;20(3):139-151. doi:10.1089/omi.2015.0168                                                        | 423<br>424<br>425        |
| 24. Sobreira N, Schiettecatte F, Valle D, Hamosh A. GeneMatcher: a matching tool for connecting investigators with an interest in the same gene. <i>Hum Mutat.</i> 2015;36(10):928-930. doi:10.1002/humu.22844                                                                                     | 426<br>427<br>428        |
| 25. Lonsdale J, Thomas J, Salvatore M, et al. The Genotype-Tissue Expression (GTEx) project. <i>Nat Genet.</i> 2013;45(6):580-585. doi:10.1038/ng.2653                                                                                                                                             | 429<br>430               |
| 26. Grzybowska EA. Human intronless genes: functional groups, associated diseases, evolution, and mRNA processing in absence of splicing. <i>Biochem Biophys Res Commun.</i> 2012;424(1):1-6. doi:10.1016/j.bbrc.2012.06.092                                                                       | 431<br>432<br>433        |
| 27. Pena V, Rozov A, Fabrizio P, Lührmann R, Wahl MC. Structure and function of an RNase H domain at the heart of the spliceosome. <i>EMBO J.</i> 2008;27(21):2929-2940. doi:10.1038/emboj.2008.209                                                                                                | 434<br>435               |
| 28. Matera AG, Wang Z. A day in the life of the spliceosome. <i>Nat Rev Mol Cell Biol.</i> 2014;15(2):108-121. doi:10.1038/nrm3742                                                                                                                                                                 | 436<br>437               |

29. Lee Y, Rio DC. Mechanisms and Regulation of Alternative Pre-mRNA Splicing. *Annu Rev Biochem.* 2015;84:291-323. doi:10.1146/annurev-biochem-060614-034316 438  
439
30. Tebbenkamp ATN, Willsey AJ, State MW, Šestan N. The Developmental Transcriptome of the Human Brain: Implications for Neurodevelopmental Disorders. *Curr Opin Neurol.* 2014;27(2):149-156. doi:10.1097/WCO.000000000000069 440  
441  
442
31. Xu M, Xie YA, Abouzeid H, et al. Mutations in the Spliceosome Component CWC27 Cause Retinal Degeneration with or without Additional Developmental Anomalies. *Am J Hum Genet.* 2017;100(4):592-604. doi:10.1016/j.ajhg.2017.02.008 443  
444  
445
32. Martin EMMA, Enriquez A, Sparrow DB, et al. Heterozygous loss of WBP11 function causes multiple congenital defects in humans and mice. *Hum Mol Genet.* 2020;29(22):3662-3678. doi:10.1093/hmg/ddaa258 446  
447  
448  
449

FIGURE LEGENDS 450

**Figure 1. Clinical and genetic findings in eight families with *WBP4*-related syndrome.** A. Pedigrees of 451  
eight families with *WBP4*-related syndrome. Symbols: filled black – affected individuals; diagonal line 452  
– deceased; double line – consanguinity; arrows indicate the probands. In each family the likely 453  
pathogenic variant in *WBP4* is written beneath the pedigree using NM\_007187.5 transcript. 454  
Homozygotes for the likely pathogenic variant are noted as -/- and heterozygotes as +/- . F2-II-1 died of 455  
aspiration pneumonia in childhood. F5-II:4 died of intestinal obstruction in infancy; the parents of the 456  
proband (I:1 and I:2) are from the same village. F8-II:1 died in infancy due to cardiopathy. B. Magnetic 457  
resonance images (MRI) of two patients during their early childhood. MRI of F2-II:1 shows agenesis of 458  
corpus callosum (arrow) and a midsagittal T1-weighted MRI of F4-II:1 shows hypoplastic corpus 459  
callosum (arrow). C. Schematic diagram of *WBP4* transcript NM\_007187.5 and the five LOF variants 460  
identified in our study. The gray rectangles represent exons 1-10 starting from left to right. The 461  
functional domains (zinc finger, WW1, WW2) of the protein are drawn below as blue and green 462  
rectangles. 463

**Figure 2. Immunoblotting and RNA sequencing analysis in Families 1 and 2.** A. Western blot was 465  
performed to analyze the expression levels of *WBP4* and actin proteins in fibroblast cell cultures from 466  
controls, family 1 (F1-I:2 mother, F1-I:1 father, F1-II:1 proband) and family 2 (F2-I:2 mother, F2-I:1 467  
father, F2-II:1 proband). B. Summary of significant abnormal splicing events (FDR<0.05, IncLDiff < 468  
|0.1|) identified using rMATS in individual F1-II:1 (upper panel) and individual F2-II:1 (lower panel). C. 469  
Gene set enrichment for human phenotypes in individual F1-II:1 (upper panel) and individual F2-II:1 470  
(lower panel). Enrichment is represented as the number of genes matching each human phenotype 471  
and the enrichment significance  $-(\text{Log}_{10})$  P-value). 472

**Figure 3. Common abnormal splicing events in F1-II:1 -/- and F2-II:1 -/-.** A. RNA was extracted from 474  
fibroblasts of F1-I:2 +/-, F1-I:1 +/-, F1-II:1 -/-, F2-I:2 +/-, F2-I:1 +/- and F2-II:1 -/- fibroblasts and 475

subjected to sequencing. Principal component analysis plot of PC1 and PC2 representing the variance 476  
between normalized exon read-counts in the two probands and their *WBP4* +/- relatives. B. Venn 477  
diagram representing the overlap in splicing between the two affected individuals (F1-II:1 and F2-II:1). 478  
C. Gene set enrichment analysis for 619 overlapping abnormally spliced genes. Gene set enrichment 479  
for human phenotypes, enrichment is represented as the number of genes matching each human 480  
phenotype and the enrichment significance  $-(\text{Log}_{10})$  P-value). 481

**Figure 1**

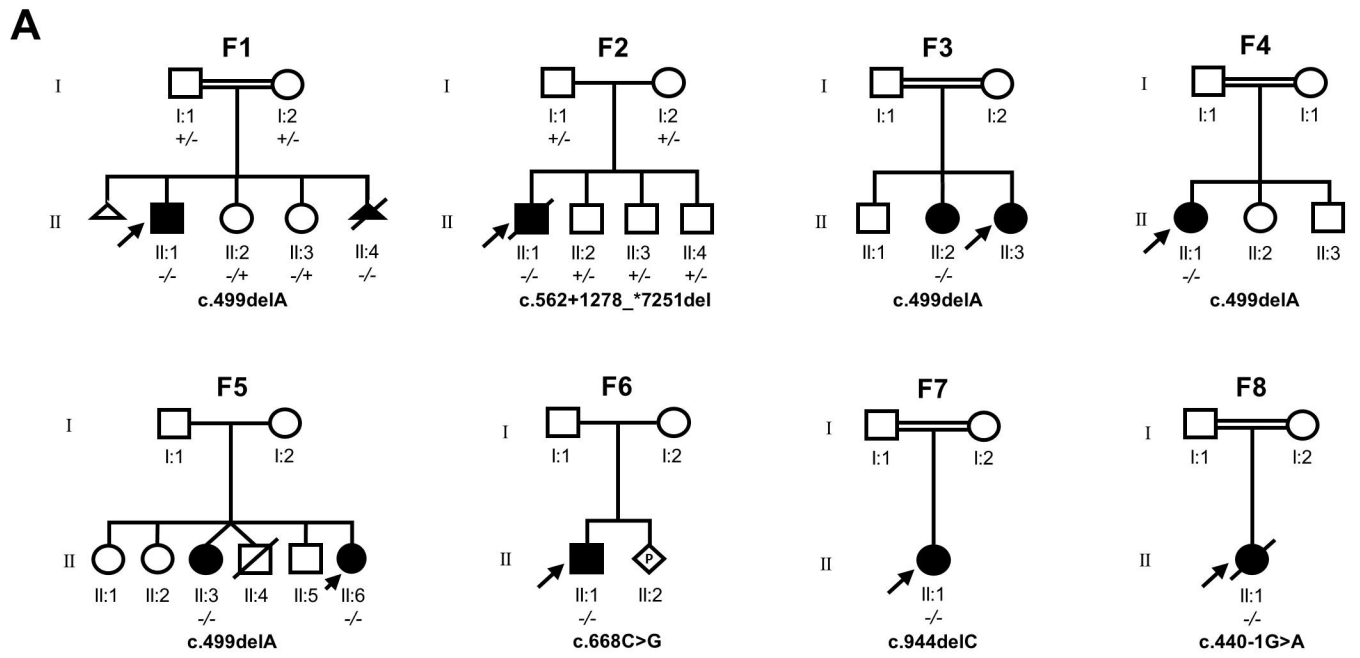

**B**

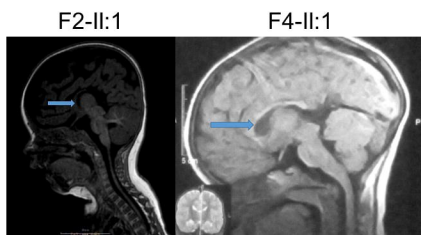

**C**

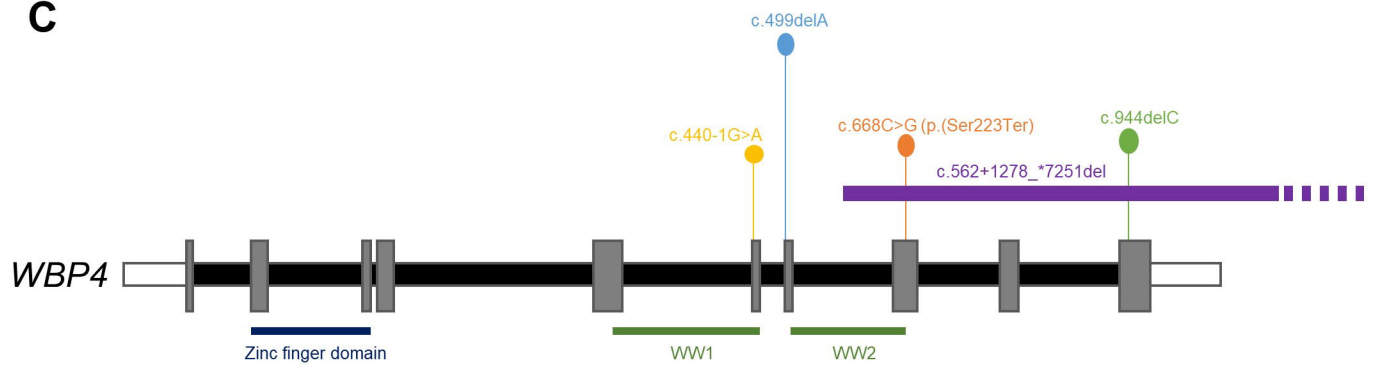

# Figure 2

**A**

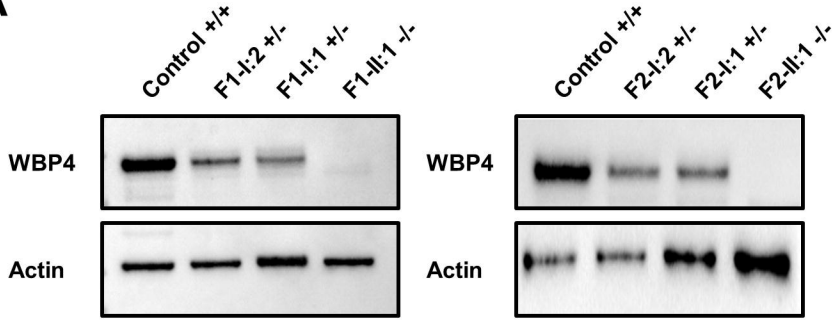

**B**

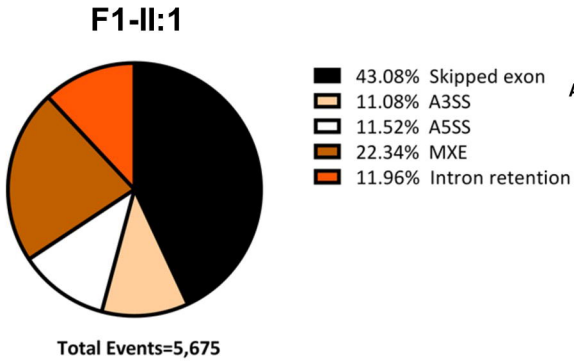

**C**

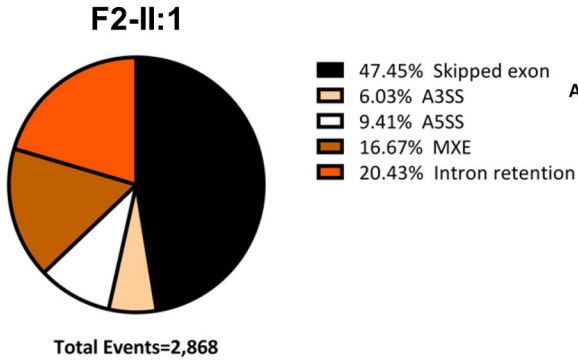

**C**

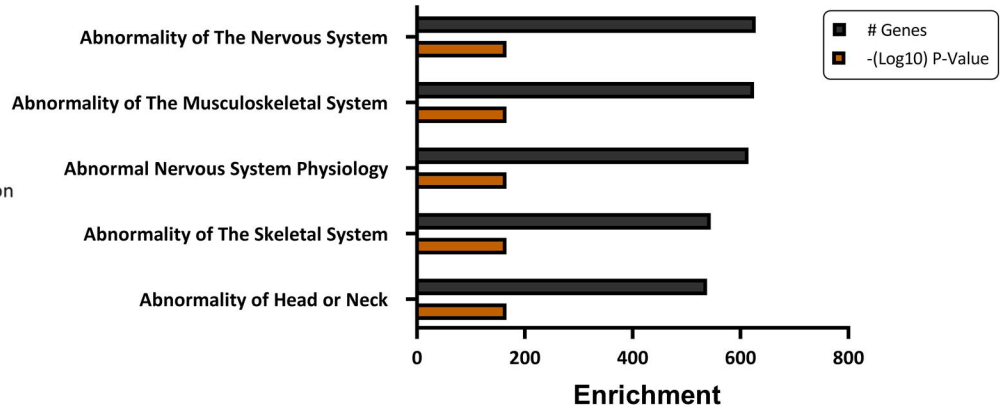

**C**

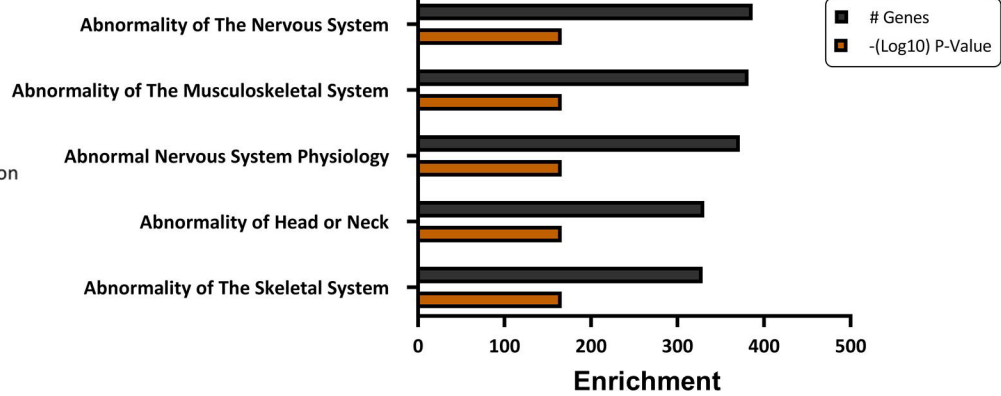

# Figure 3

**A**

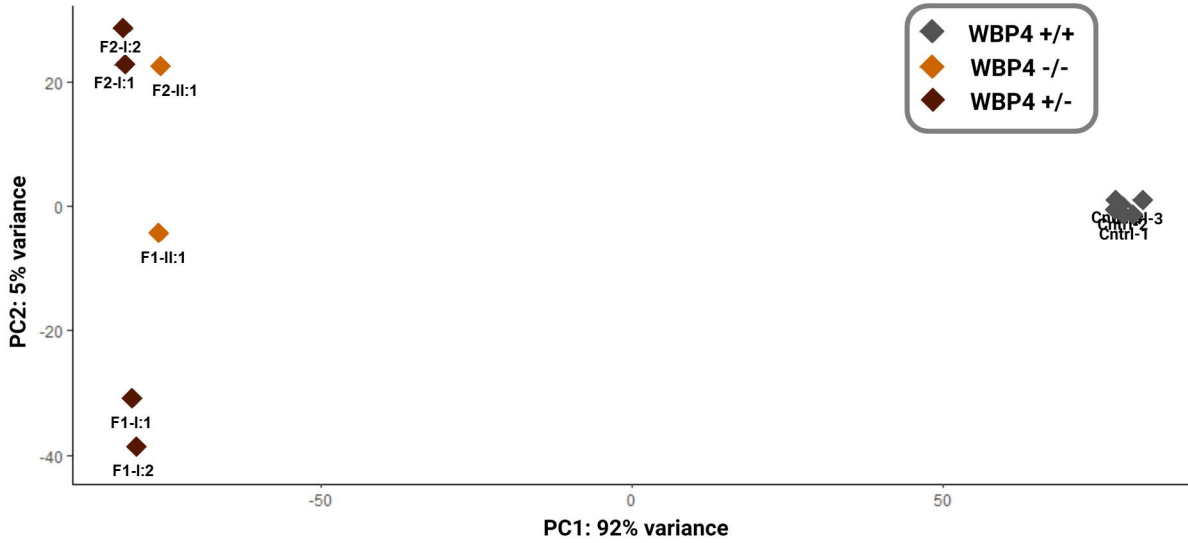

**B**

## Alternatively spliced genes

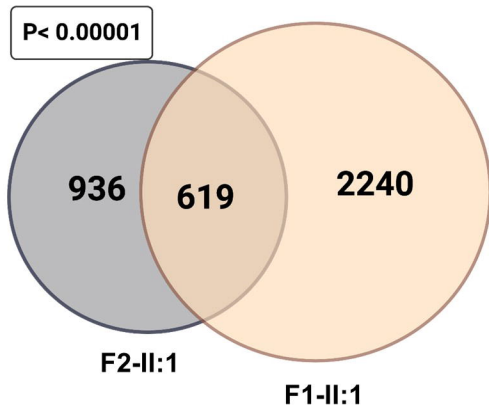

**C**

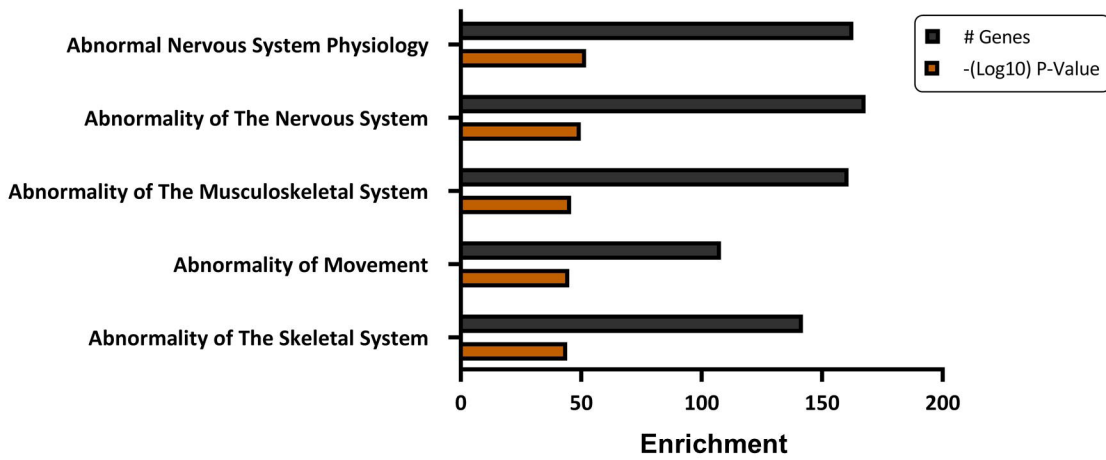

**Table 1. Summary of the demographic, genetic and clinical features of individuals with *WBP4*-related syndrome. All patients are homozygous for the variant in *WBP4* and the frequency of characteristics is presented as a ratio of patients with the feature to patients with data.**

| Characteristic                                           | Individuals with <i>WBP4</i> -related syndrome (n=11) |
|----------------------------------------------------------|-------------------------------------------------------|
| Age at last investigation, years (n=8)                   |                                                       |
| Median                                                   | 3                                                     |
| Range                                                    | 1.25 to 10                                            |
| Gender                                                   |                                                       |
| Female                                                   | 8/11                                                  |
| Ethnicity                                                |                                                       |
| Egyptian                                                 | 5/9                                                   |
| Arab Muslim                                              | 2/9                                                   |
| Estonian                                                 | 1/9                                                   |
| Indian                                                   | 1/9                                                   |
| WBP4 variant (%)                                         |                                                       |
| c.499delA                                                | 7/11                                                  |
| c.562+1278_*7251del                                      | 1/11                                                  |
| c.668C>G                                                 | 1/11                                                  |
| c.944delC                                                | 1/11                                                  |
| c.440-1G>A                                               | 1/11                                                  |
| Motor delay                                              | 8/8                                                   |
| Speech delay                                             | 8/8                                                   |
| Hypotonia                                                | 7/7                                                   |
| Dysmorphic facial features                               |                                                       |
| Abnormality of the outer ear                             | 6/7                                                   |
| Abnormal palate morphology                               | 4/8                                                   |
| Hypertelorism                                            | 4/6                                                   |
| Fine hair                                                | 3/7                                                   |
| Feeding difficulties / Failure to thrive                 | 6/7                                                   |
| Aplasia/Hypoplasia of the corpus callosum                | 5/8                                                   |
| Other morphological central nervous system abnormalities | 5/8                                                   |
| Atypical behavior                                        |                                                       |
| Autistic features                                        | 5/7                                                   |
| Hyperactivity                                            | 5/7                                                   |
| Stereotypy                                               | 4/7                                                   |
| Sleep-wake cycle disturbance                             | 4/5                                                   |
| Intellectual disability                                  | 5/5                                                   |
| Congenital heart defect                                  | 4/7                                                   |
| Prenatal issues                                          | 3/10                                                  |
| Urogenital abnormalities                                 | 3/10                                                  |
| Weight and height <-2 SD at last investigation           | 3/6                                                   |
| Skeletal abnormalities                                   | 3/4                                                   |
